# Supplementary material
Source: PubMed Central journal article supplement (PMC4044832)
Supplement: supp_pp.113.230540_230540suppfigstbls.pdf [file supp_pp.113.230540_230540suppfigstbls.pdf]

## SUPPLEMENTARY FIGURES AND TABLES

### Genome-wide analysis of heat-sensitive alternative splicing in *Physcomitrella patens*

Chiung-Yun Chang, Wen-Dar Lin and Shih-Long Tu

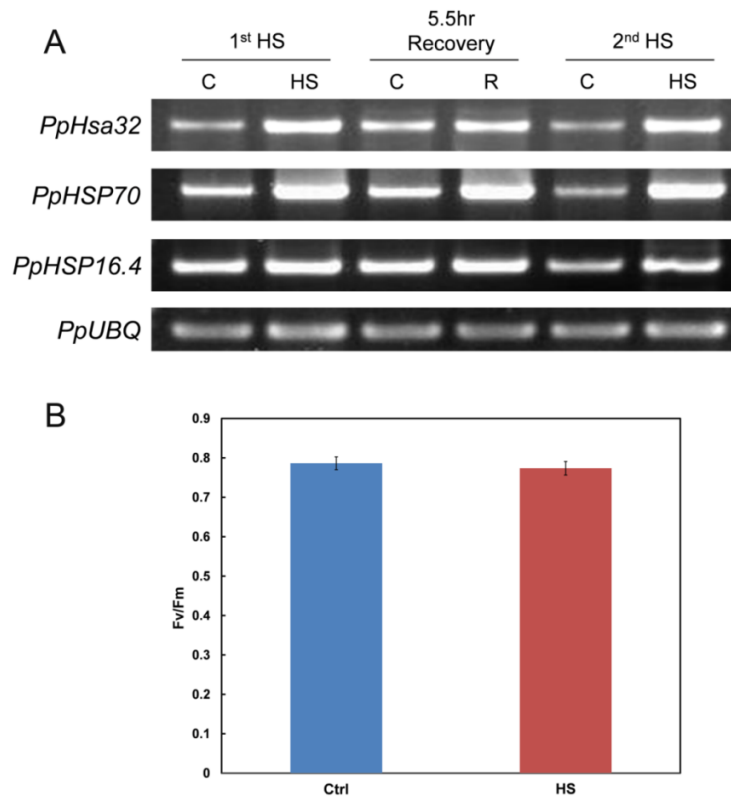

**Supplemental Figure S1.** Confirmation of heat shock (HS) response in *Physcomitrella*. (A) Expression of HS marker genes. Pooled RNA from control (C), 1<sup>st</sup> HS, 5.5 h recovery, and 2<sup>nd</sup> HS samples were used for RT-PCR reaction. Primer sets specific for *PpHsa32*, *PpHSP70*, *PpHSP16.4*, and *PpUBQ* transcripts were used. *PpUBQ* was used as a control. C, control; HS, HS-treated sample; R, 5.5 h recovered sample. (B) Photosynthetic efficiency of HS-treated samples. Chlorophyll *a* fluorescence of protonema was measured immediately after 2<sup>nd</sup> HS treatment. Protonema grown under normal temperature was used as the control (Ctrl).

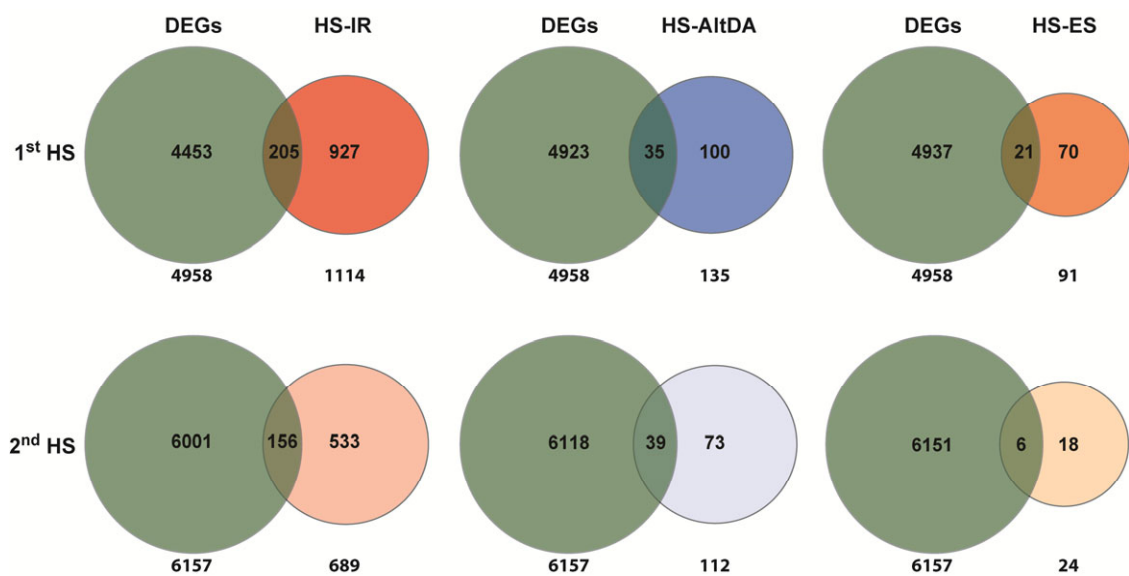

**Supplemental Figure S2.** Comparison of genes differentially expressed and alternatively spliced in response to 1<sup>st</sup> HS and 2<sup>nd</sup> HS. Venn diagrams show the comparison of differential expressed genes (DEGs) and heat-sensitive IR (HS-IR), AltDA (HS-AltDA) and ES (HS-ES) genes identified in 1<sup>st</sup> HS and 2<sup>nd</sup> HS samples. Numbers of DEGs and heat-sensitive AS genes are listed under each set. Numbers of specific and overlapped genes in each diagram are indicated.

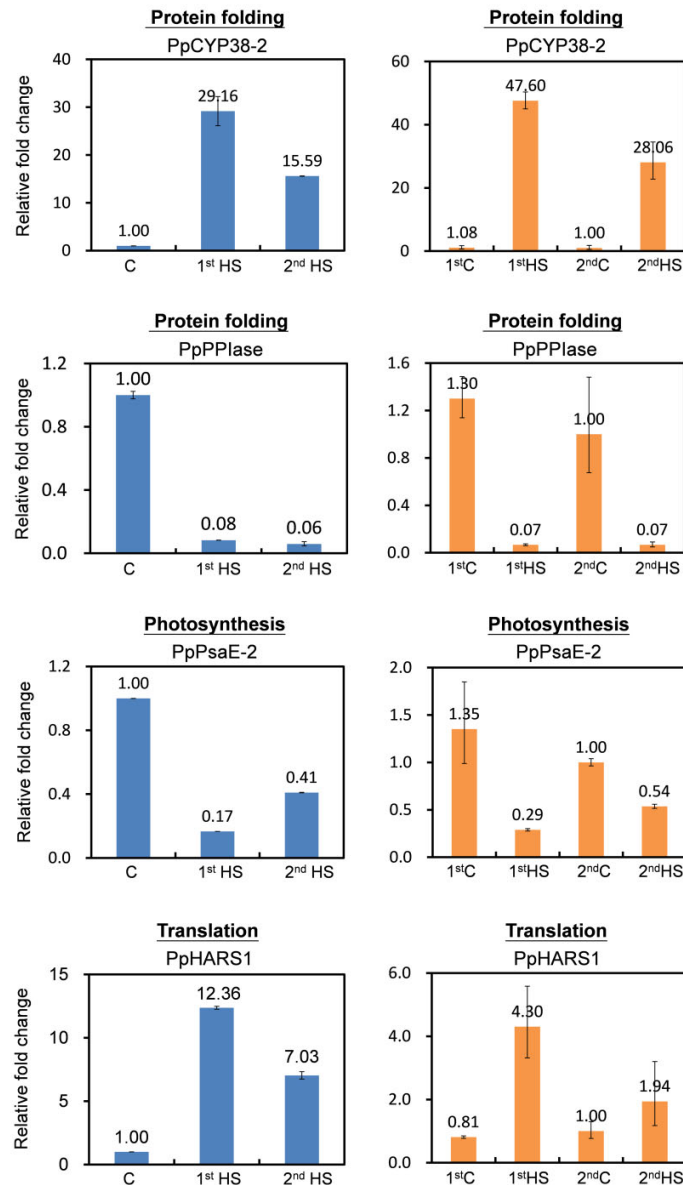

**Supplemental Figure S3.** Validation of HS-IR events. qRT-PCR data from pooled RNA (also in the manuscript) for 4 genes were shown in the left panels (blue bars), where “C” indicates the untreated control of 2<sup>nd</sup> HS (2<sup>nd</sup> C in the right panels). qRT-PCR data from unpooled RNAs were shown in the right panels (orange bars). *PpACT2* was first used as an internal control for normalizing each qPCR reaction. Level of the IR isoforms from three biological replicates were further normalized for overall expression level of each gene and then compared with data from the control of 2<sup>nd</sup> HS (2<sup>nd</sup> C) to generate the relative IR level. Corresponding gene products of selected IR events and representative processes are shown above each graph.

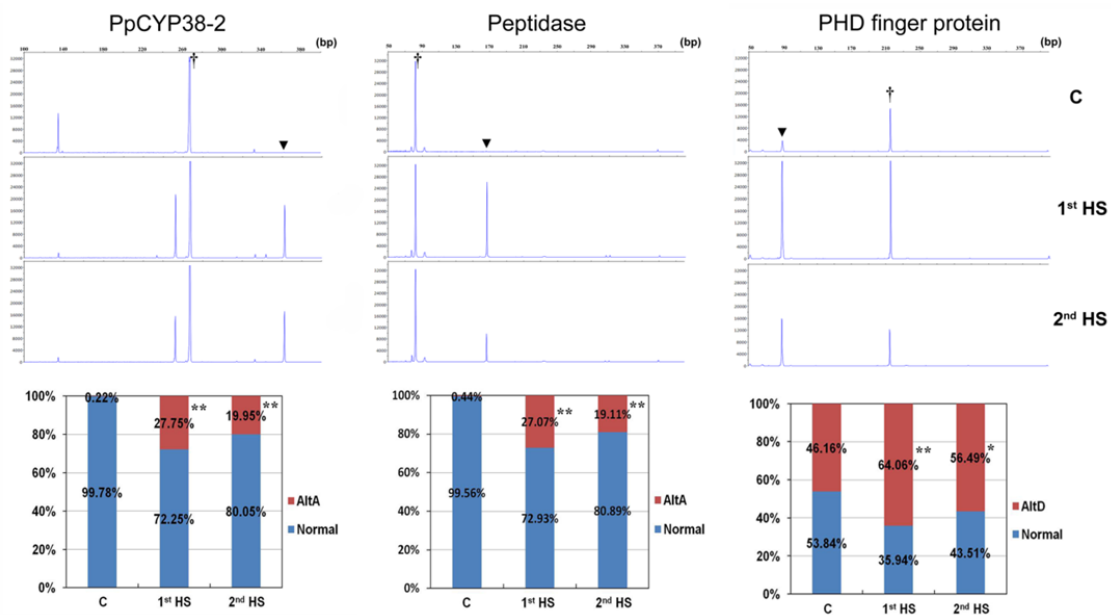

**Supplemental Figure S4.** Validation of heat-regulated AltD and AltA sites. High-resolution RT-PCR was used for determining the expression level of selected AltD and AltA isoforms. Pooled RNA from control (C), 1<sup>st</sup> HS and 2<sup>nd</sup> HS samples were used in triplicate for RT-PCR. Primer sets designed for amplifying the AltD and AltA regions were used. DNA fragments were separated on an ABI3730 DNA Analyzer with 3 technical repeats. Integrated peak areas of RT-PCR products identified with expected sizes were used as the relative expression level. Percentage of each AS isoform was calculated by dividing by the sum of all transcripts. Significance: \*\*  $P < 0.01$ ; \*  $0.01 > P > 0.05$ . †, PCR products from constitutive spliced isoforms; ▼, PCR products from alternatively spliced isoforms. Gene IDs and annotations are in Supplemental Dataset S9.

```

                *           24           *           48           *
Pp1s19_153V6 : -----MSLSFNN-----SEAGCMLFY-----
Pp1s85_27V6 : -----MSLAFDN-----SETGCMLFY-----
Pp1s12_41V6 : -----MSLSFDN-----SETGCMLLF-----
Pp1s207_20V6 : -----MTLSLDTSC-----TEGASLLTY-----
AT-HSFB4 : -----MAMMVENSYGGYGG-----GGGERIQLMVE-----
HSFB1 : -----MTAVT-----
AT-HSFB2a : -----MNSPPVDAMITGESS-----
AT-HSFB3 : -----MEDAGEHLRCNDNVNDEERLPLEF-----MIGNSTS-----
AT-HSFB2b : ---MPGEQTGETPTVAGVGGGAGCSAGN-----SGSSGCGAGGGGGSGGGGGGGG-----
ATHSFA1d : ---MDV-----SKVTTSDGG-----GDSMETKPSQPQPAAI-----
HSFA1a : ---MFVNFKYFSFFIRTKMGDVTGGGTN-----IGEAVTAPPPrNPHPATL-----
ATHSFA1e : -----MGTVCESVATA-----KSSTAVMS-----
AT-HSFA7b : -----MDPS-----SSSRARSMPPVPME-----
ATHSFA2 : -----MEELKVEEETVFTG-----SVAASSSVGSSSSPRPME-----
AT-HSFA6b : ---MDPSFRFIKEEFPAGFSDSPSPSSSSYLYSSMAEAAINDPTTLYSQPLE-----
AT-HSFA6a : -----MDYNLPIPLE-----
AT-HSFA7a : -----MMNPF-----LPEGCDPPPPQPM-----
HSFA1b : -----MESVPEVSP-----NSNTPSIPPPVN-----
Pp1s249_84V6 : ---MVSQVLKTDPHWPPLEESMGQERYA-----LNTDVI PSSAVGSLNSVQPMD-----
Pp1s84_95V6 : ---MVSQVVKTDPHWPPLEESMGQERYA-----LNSDVVPSVPGFHNLSAQPM-----
Pp1s42_157V6 : ---MGSETPWPSVETHDNAGKLA-----LAAGIASANPAP---QMDAPP-----
Pp1s31_388V6 : ---MGGETQWPSAEAKEKNGIPP-----PAGGTASGNPTS---QMDAP-----
AT-HSFA8 : -----MVKSTD-----GGGSSSS-----
AT-HSFA4c : -----MD-----ENNGG-----
AT-HSFA5 : -----MNGALGNSSA-----SVSGGEG-----
AT-HSFC1 : -----MEDDNSNNNN-----
AT-HSFA3 : ---MSPKKDAVSKPTPIVPPVSRSDIPG-----SLYVDTDMGFSGSPMPPLD-----
AT-HSFA9 : MTAIPNVVDIESSSSSLCQETATETVTV-----RGSDDSSSKPDDVLLIKEEDDAVNLSLGF-----
AT-HSFA4a : -----MD-----ENNHGVS-----
AT1G77570.1 : -----MLKSRPNYSK-----LLICEVCEVLGM-----
AT4G18870.1 : -----MSKNEGSLTS-----

```

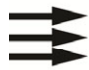

```

                96           *           120           *           144           *
Pp1s19_153V6 : DPSTNEIVSWGE-DDTFFVVRPPEFARDLLENYFKH--NMFSSFVROLNTYGFRKVV--PDRWEFANDF
Pp1s85_27V6 : DPATNDIVSWGE-DGTFVVRPPEFARDLLENYFKH--NMFSSFVROLNTYGFRKVV--PERWEFANDY
Pp1s12_41V6 : DPSTNEIVSWGE-TNTFFVVRPPEFARDLLEKYFKH--NMFSSFVROLNTYGFRKIV--PERWEFASDF
Pp1s207_20V6 : DPATDDIVSWGE-DETFVVRPPEFARDLLENYFKH--NMFSSFVROLNTYGFRKIV--PDHWEFANKF
AT-HSFB4 : DPATDHVSWGD-DDTFFVVRPPEFARDLLENYFKH--NMFSSFVROLNTYGFRKIV--PDRWEFANEF
HSFB1 : DHSDDVSWNE-EGTFFVVKTAFAKDLLEKYFKH--NMFSSFVROLNTYGFRKIV--PDKWEFANDY
AT-HSFB2a : DSSDDVSWNE-DGSSFIVVNPTDFAKDLLEKHEKH--NMFSSFVROLNTYGFRKVV--PDRWEFSNDF
AT-HSFB3 : DPTDGVISWNE-YGTGFVVVQPAEFARDLLETLFKH--CNFSSFVROLNTYGFRKVT--TIWWEFSNEM
AT-HSFB2b : DPVYDELISWNE-DGTFIVVRPAEFARDLLEKYFKH--NMFSSFVROLNTYGFRKVV--PDRWEFSNDC
ATHSFA1d : DHNTDSIVSWSA-NNNSFIVVKPPEFARDLLEKNEKH--NMFSSFVROLNTYGFRKVD--PDRWEFANEH
HSFA1a : DPATDAIVSWSP-TNNSFIVVDPPEFSRDLEKYFKH--NMFSSFVROLNTYGFRKVD--PDRWEFANEH
ATHSFA1e : DPLTDDVSWSS-GNNSFVVVNPPEFAQELLEKYFKH--NMFSSFVROLNTYGFRKVD--PDRWEFANEH
AT-HSFA7b : DPNTDHIVSWNR-GGTSFVVVDLHFSFSTILLRYFKH--NMFSSFVROLNTYGFRKIE--AERWEFANEH
ATHSFA2 : DPATDVVSWSN-GRNSFVVVDSHKFSTILLRYFKH--NMFSSFVROLNTYGFRKID--PDRWEFANEH
AT-HSFA6b : DSRNHHVSWSK-SNNSFIVVDPQAFSVTLLEPRFFKH--NMFSSFVROLNTYGFRKVN--PDRWEFANEH
AT-HSFA6a : DSSNNIVSWSR-DNNSFIVVEPETFALICLERCFKH--NMFSSFVROLNTYGFRKID--TERWEFANEH
AT-HSFA7a : DPNTDHIVSWNR-GGTSFVVVDLHFSFSTILLRYFKH--NMFSSFVROLNTYGFRKIE--AERWEFANEH
HSFA1b : DPLTNEVSWSS-GNNSFVVVSAPEFSKVLLEKYFKH--NMFSSFVROLNTYGFRKVD--PDRWEFANEH
Pp1s249_84V6 : DPATDPVSWSA-GNNSFIVVNPPEFAQELLEKYFKH--NMFSSFVROLNTYGFRKVD--PDRWEFANEH
Pp1s84_95V6 : DPATDPVSWST-GHNSFIVVNPPEFAQELLEKYFKH--NMFSSFVROLNTYGFRKVD--PDRWEFANEH
Pp1s42_157V6 : VSATDAIVSWSE-VGNSFVVVNPPEFAQELLEKYFKH--NMFSSFVROLNTYGFRKVD--PDRWEFANEH
Pp1s31_388V6 : DPATDAIVSWSE-VGNSFVVVNPPEFAQELLEKYFKH--NMFSSFVROLNTYGFRKVD--PDRWEFANEH
AT-HSFA8 : DSTDSIIWSPSADNSFVILDTHVSVQLLEKYFKH--NMFSSFVROLNTYGFRKVD--ADRWEFANDG
AT-HSFA4c : DSSSDSVWVWSE-NNKSFIVKNEAFAFRDLEPRFFKH--NMFSSFVROLNTYGFRKVD--PEKWEFLNDD
AT-HSFA5 : DSSDQIVSWSA-NNNSFIVVNHAEFSRDLEPRFFKH--NMFSSFVROLNTYGFRKID--PERWEFLNDD
AT-HSFC1 : DPTDVLIIWGP-AHNSFIVVDPDLFQSRILEAYFKH--NMFSSFVROLNTYGFRKVD--PDRWEFANEH
AT-HSFA3 : DPTLDPVSWGL-TGASFVVVDPLEFARILLRNEKH--NMFSSFVROLNTYGFRKID--TDKWEFANEH
AT-HSFA9 : TKVTDPVVSWSP-TRKSFIINDSYESENLEKYFKH--NMFSSFVROLNTYGFRKVD--SDRWEFANEH
AT-HSFA4a : DSSDSIVSWSQ-SNKSFIVVNPPEFSRDLEPRFFKH--NMFSSFVROLNTYGFRKID--PEQWEFANDD
AT1G77570.1 : DASTDAIISWSE-SNNSFIINNVGEFYRRILEKYVDLGTLLSREFSNLSRSGFKIWKRTGVLEFGHED
AT4G18870.1 : DLSLDSIIWWSQ-SGKSFIINNPPEFYNNLLORFCFQ--RINIEFSFLFSHGFRKID--SGKWEFANDN

```

d 1 66 W F66w F Lp fkh nfs F rqln yGF4k wEF n

```

          192          *          216          *          240
Pp1s19_153V6 : LQPASCSG---SAKQSRs-----LSPS-----TSIEE---QAWSPVSSP
Pp1s85_27V6 : LQPASGTG---SAQQSRs-----LSPS-----TSIED---QAWSPISSP
Pp1s12_41V6 : LQPVSVTG---SVQQSRs-----LSP-----TSIED---QAWSSITSA
Pp1s207_20V6 : SGPFSLSC---DAPGSQS-----TSPT-----NSGED---QAWSPFPSP
AT-HSFB4 : PQQHSPFM---SHHAPP-----QIPFSGGSFFLPPPRVTTPEE---DHYWCDDSP
HSFB1 : IASTAGKC---VVVGSFS-----ESNS-----GGDD---HGSSTSSP
AT-HSFB2a : QTVVAPSS---EQRNQT-----MVSFS-----NSGEDNNNNQVMS--SP
AT-HSFB3 : -QHWSHNK---SNHQVPT-----TTMVN---QEGHQRIIGI
AT-HSFB2b : MAAAAAAA---AAVAASAVTVAA--VPVVAHIVSFS-----NSGEE---QVLISSNSP
ATHSFA1d : GQG-----HQRSQHSNGQN-----SSVSACVEVGKFGLEEEVERLKRDKNVL
HSFA1a : GSSSS---NPQSQQLSQGGs-----MAALSSCVEVGKFGLEEEVERLKRDKNVL
ATHSFA1e : P-----PQQPQVQH-----SSVGACVEVGKFGLEEEVERLKRDKNVL
AT-HSFA7b : PSL-----NYSQSQPE-----AHDPGVELPQLREERHVL
ATHSFA2 : -----LQNVNQOG-----SGMSCVEVGQYGFGEVERLKRDKHVL
AT-HSFA6b : NQM-----QQQSSEQQS-----LDNFCIEVGRYGLDGENDSLRRDKQVL
AT-HSFA6a : -----QTQS-----LEGEIHELRRDMAL
AT-HSFA7a : -----FTPSSSP-----SHD---ACNELRREKQVL
HSFA1b : QN-----QQQTQVQS-----SSVGACVEVGKFGIEEEVERLKRDKNVL
Pp1s249_84V6 : -----QSVQQQQQQHQQSEQGP-----VGPCVEVGKFGLEGEIERLKRDKNVL
Pp1s84_95V6 : -----QSAQQQQQ--HQQTDQGS-----VGPCVEVGKFGLEGEIERLKRDKNVL
Pp1s42_157V6 : -----QQQQ-----GSCVEVGKLGLEGEIERLKRDKNVL
Pp1s31_388V6 : -----QQQQ-----GAYVEGKSGLEAEIERLKTDKNVL
AT-HSFA8 : -----EQSKHES-----TSTTYAQEKSGLWKEVDILKGDQKVL
AT-HSFA4c : SLVNLQAO---NPLTESER-----RSMEDQIERLKNEKEGL
AT-HSFA5 : SHP-----PASSTDQER-----AVLQEQMDKLSREKAAI
AT-HSFC1 : YG-----QLEDGEIVR-----EIERLKEEQREL
AT-HSFA3 : QTCCSSTS---SQSGSPTEVG-----GETEKLKERRAL
AT-HSFA9 : CN-----KEASTTT-----ETEVELKKEEQSPM
AT-HSFA4a : SLPNLQAO---LNPLTDSER-----VRMNNQIERLTKEKEGL
AT1G77570.1 :
AT4G18870.1 : QYDQG-----MELFKAEKLFAR-----LVKKVQDQLPPHNSYP

```

```

          *          288          *          312
Pp1s19_153V6 : ---VMSI SDENERLRKDNLLI SEI SRLRRLYEETIYMIHQH-FK : 208
Pp1s85_27V6 : ---VMSI SDENERLRKDNLLI CEI SRLRRLYEETVSIHQH-YK : 208
Pp1s12_41V6 : ---TIGI SDEMEKLRKDNMLI SEI SRLRRLYEEAMAIHQHNFK : 207
Pp1s207_20V6 : ----VSDENERLRHDNRMLI LEI SRLRRLYDDLIVVILQQQ--- : 209
AT-HSFB4 : ---VTAI SEDNERLRRSNTVLM SEI AHMKKLYNDIIYFVQNH--- : 231
HSFB1 : ---VADI SGENEKLKRENNNI SSEI AAAAKQRDELVTFLTGH--- : 191
AT-HSFB2a : ---VTEI LEENEKLRSONIQ NREI TOMKSIDCNITYSLMSNY--- : 210
AT-HSFB3 : ---YTAI LDENKCLKNENELI SCEI GKTKKCKGLMELVERY--- : 217
AT-HSFB2b : CTTAPEI VEENERLRKDNERI RKEI TKLKGLYANIYTLMANF--- : 264
ATHSFA1d : ---LQTI VQRLQGMENRQQQLM SFI AKAVQSPHFLSQFLQQQNQQ : 234
HSFA1a : ---LQVI VKHLQVMEQRQQQIM SFI AKAVQNPTFLSQFIQKQT-- : 252
ATHSFA1e : ---LQNI VGKVVHMEQRQQQMM SFI AKAVQSPGFLNQFSQQSN-- : 213
AT-HSFA7b : ---VQAI EQRINGAEKKQRHMM SFI RRAVENPSSLQQIFEQK--- : 209
ATHSFA2 : ---VAAI EQRLLVTEKRQQQMM TFI AKALNNPNFVQQFAVMSKE- : 231
AT-HSFA6b : ---LTL EEEKLKKTESKQKQMM SFI ARAMQNPDFIQQIIVEQKEK- : 255
AT-HSFA6a : ---LHL EEEKLVTEVKQEMMMNFI LKKIKKPSFLQSLRKRNLQ- : 192
AT-HSFA7a : ---IKAI EQRIEGTERKQRQMM SFI ARAMQSPSFLHQLLKQ--- : 198
HSFA1b : ---LQNI VGKVVQVMEQRQQQMM SFI AKAVQSPGFLNLVQQNNN- : 219
Pp1s249_84V6 : ---LQAI GORLLT TENRQQHMM SFI AKAMQNP SFLAQLMQQSEN- : 257
Pp1s84_95V6 : ---LQAI GORLLT TENRQQHMM SFI AKAMQNP SFLAQLMQQSEN- : 255
Pp1s42_157V6 : ---LQVI TORFHVSEHRQRMT SFI TKAMQNP SFFAQFVQQQNE- : 228
Pp1s31_388V6 : ---LQNI AQRLHVSESRQQRMTI TFI AKAMANPSLFAQFVQQQNE- : 227
AT-HSFA8 : ---MLHI EDRVQGMEESSQEM SFI VMVMKNPSLLVQLLQPKKE- : 207
AT-HSFA4c : ---VTTI KDRLOHMEQHQSIVAYI SQVLGPK---GLSLNLEN- : 196
AT-HSFA5 : ---FEETI EHVDMMENRQKLLNFI ETATRNPTFVKNF GKKEQL : 207
AT-HSFC1 : ---IQRI NRRTEATEKRPEQMMAFI YKVVEDPDLPRMMLEKERT : 182
AT-HSFA3 : ---VDTI NQRKAABEQKQLL SFI AKLFQNRGFLERLKNFKGKE : 241
AT-HSFA9 : ---MVTI QEKIHGVDTEQQHMI SFI FAKLAKDQRFVERLVKRRKMK : 250
AT-HSFA4a : ---VKEI KERLOHMEKROKTMV SFI SQVLEKP---GLALNLSPC : 200
AT1G77570.1 : ----KARKAASKARKARVQVEFI FOHLQI----- : 147
AT4G18870.1 : ----SSDAI ISWSQSGKSFIIWNPOEFCKDHLRRLFNFLHIHF : 197

```

**Supplemental Figure S5.** Multiple sequence alignment of *Arabidopsis* and *Physcomitrella* heat shock transcription factors (HSFs). DBD and HR-A/B domains of HSF proteins derived from *Arabidopsis thaliana* (AT) and *Physcomitrella patens* (Pp) were used. The genes annotated as *PpHSFA1-1* (Pp1s31\_388V6), *PpHSFA1-2* (Pp1s42\_157V6) and *PpHSFA1-3* (Pp1s84\_95V6) in this study is indicated by arrows.

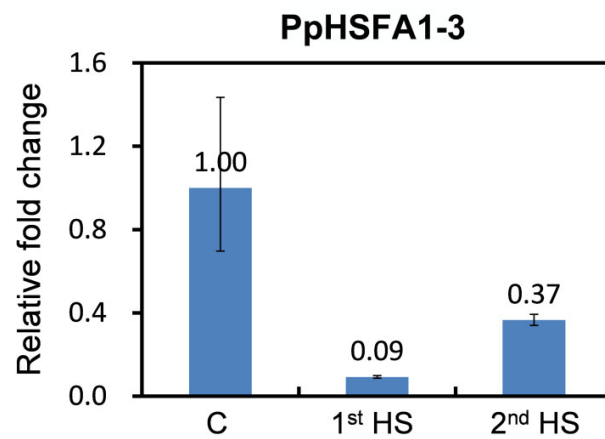

**Supplemental Figure S6.** Validation of heat-regulated IR on *PpHSFA1-3* transcripts. Pooled RNA from control (C), 1<sup>st</sup> HS and 2<sup>nd</sup> HS samples was analyzed in triplicate for quantitative RT-PCR (qRT-PCR). Primer sets designed for *PpHSFA1-3* IR isoforms, total transcripts of the corresponding gene, and the *PpACT2* were used. *PpACT2* was first used as an internal control for normalizing each qPCR reaction. Level of the IR isoform were further normalized for overall expression level and then compared with data from the HS control to generate the relative IR level. Annotations and gene IDs are in Supplemental Dataset S9.

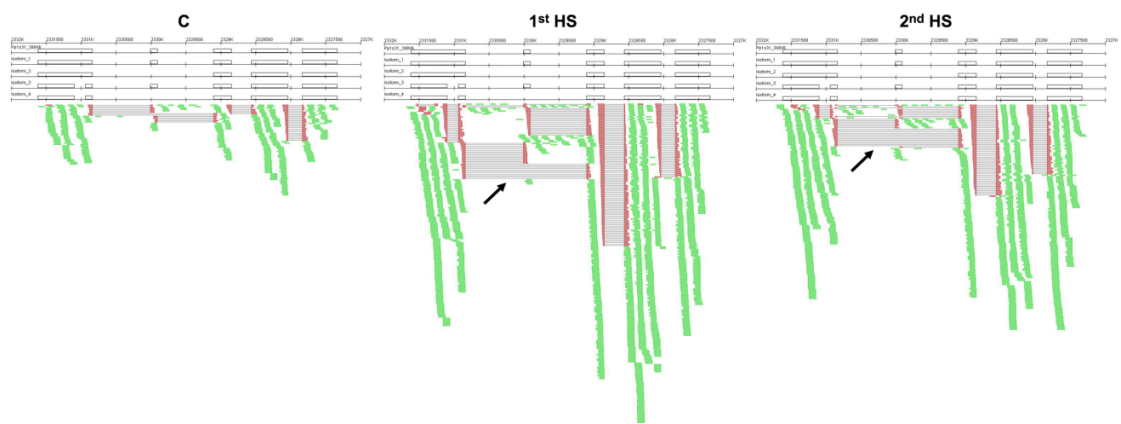

**Supplemental Figure S7.** Mapping results for *PpHSFA1-1* from control (C), 1<sup>st</sup> HS and 2<sup>nd</sup> HS samples. Arrows indicate reads supporting exon 3 (E3) skipping.



**Supplemental Table S1.** Mapping statistics of RNA-sequencing

|                          | <b>C</b>   | <b>1<sup>st</sup> HS</b> | <b>2<sup>nd</sup> HS</b> | <b>Total</b> |
|--------------------------|------------|--------------------------|--------------------------|--------------|
| Sequence reads           | 32,458,315 | 42,737,188               | 42,727,285               | 117,922,788  |
| Mapped reads             | 22,455,889 | 23,692,513               | 21,633,044               | 67,781,446   |
| Mapping percentage (%)   | 69.18      | 55.44                    | 50.63                    | 57.48        |
| Intragenic reads         | 20,568,144 | 21,327,252               | 19,778,224               | 61,673,620   |
| Exonic reads             | 15,606,490 | 16,654,203               | 15,144,324               | 47,405,017   |
| Intronic reads           | 288,738    | 214,236                  | 209,328                  | 712,302      |
| Splice junction reads    | 4,127,768  | 3,972,194                | 3,949,534                | 12,049,496   |
| Exon-intron bridge reads | 545,148    | 486,619                  | 475,038                  | 1,506,805    |
| Intergenic reads         | 1,887,745  | 2,365,261                | 1,854,820                | 6,107,826    |

**Supplemental Table S2.** Splicing junctions (SJs) and alternative splicing events identified from BLAT and TopHat mapping tools.

|              | <b>BLAT</b> |          |                          |                          | <b>TopHat</b> |          |                          |                          |
|--------------|-------------|----------|--------------------------|--------------------------|---------------|----------|--------------------------|--------------------------|
|              | <b>All</b>  | <b>C</b> | <b>1<sup>st</sup> HS</b> | <b>2<sup>nd</sup> HS</b> | <b>All</b>    | <b>C</b> | <b>1<sup>st</sup> HS</b> | <b>2<sup>nd</sup> HS</b> |
| <b>SJs</b>   | 124,713     | 89,866   | 87,339                   | 81,730                   | 110,438       | 83,346   | 85,354                   | 81,750                   |
| <b>IR</b>    | 37,559      | 24,711   | 16,941                   | 17,645                   | 41,007        | 23,786   | 17,857                   | 19,265                   |
| <b>AltDA</b> | 31,953      | 10,590   | 13,451                   | 11,276                   | 20,051        | 7,547    | 11,483                   | 9,927                    |
| <b>ES</b>    | 1,347       | 671      | 730                      | 707                      | 1,414         | 704      | 864                      | 857                      |

SJs, Splicing junctions. IR, intron retention. AltD/A, alternative donor/acceptor site. ES, exon skipping.

**Supplemental Table S3.** Premature termination codon (PTC) prediction of IR events

|                                                              | <b>HS-IR events</b> |
|--------------------------------------------------------------|---------------------|
| IR events                                                    | 1279                |
| IR transcripts                                               | 2020                |
| IR transcripts with retained intron in protein coding region | 1556                |
| PTC in the retained intron                                   | 1529                |
| PTC in the downstream region                                 | 18                  |
| IR transcripts without PTC                                   | 9                   |
| Percentage of IR transcripts with PTC                        | 98.26%              |

**Supplemental Table S4. Primers used in this study**

| Gene product                     | Gene ID       | Primer name              | Sequence (5' to 3')      |
|----------------------------------|---------------|--------------------------|--------------------------|
| <b>RT-PCR: HS marker genes</b>   |               |                          |                          |
| PpHsa32                          | Pp1s251_75V6  | Hsa32-F                  | CCATGGAGGAAAAGCTTATTC    |
|                                  |               | Hsa32-R                  | TCACGCAAAGTGGATGCTTCG    |
| sHSP16.4                         | Pp1s27_332V6  | sHsp-F                   | GCTTCTCGCGATCTTATTCGCAG  |
|                                  |               | sHsp-R                   | CCAGTTGTACCTTCACGTCGGCTG |
| PpHSP70                          | Pp1s115_168V6 | Hsp70-2-F                | CCAAGCTGTAGTGAACCTG      |
|                                  |               | Hsp70-2-R                | CCTCCGCAGTCGCTGTAATA     |
| PpUBQ                            | Pp1s46_189V6  | PpUBQ-RT-F               | CAGCGTCTGATTTTCGCTGG     |
|                                  |               | PpUBQ-RT-R               | CGTCCACTATCAGTACGAAC     |
| <b>qRT-PCR: Intron retention</b> |               |                          |                          |
| KH domain<br>protein             | Pp1s87_162V6  | 87_162 Int2--qF          | CCATGTCGTGAGAAAGTGCATT   |
|                                  |               | 87_162 Int2--qR          | ACCACCGTGCTGTTGGTTGTAG   |
|                                  |               | 87_162 con--qF           | ATCATCAACCTCAACATGGTGG   |
|                                  |               | 87_162 con--qR           | CTCCTTTTCCAATAACAAGCCC   |
| PpPTB2                           | Pp1s326_1V6   | Q_02-11_Pp1s326_1V6 (F)  | TGACCTGAAGCGTTAGCAACCT   |
|                                  |               | Q_02-11_Pp1s326_1V6 (R)  | CAAAGCCAAAGGCAGAAAACAC   |
|                                  |               | QC_02-11_Pp1s326_1V6 (F) | ATATTTGCTGCCTGACCACGTT   |
|                                  |               | QC_02-11_Pp1s326_1V6 (R) | ATGGAGCCACCGGAAGATATG    |
| PpSRP34A                         | Pp1s28_193V6  | 28_193Int1-qF            | CATGCCCCGTTAGATTTGG      |
|                                  |               | 28_193Int1-qR            | AAAGACGTAGGAGCAGTTCGG    |
|                                  |               | 28_193V6-con-qF          | TACTCGAAGCCGTTACGTAGC    |
|                                  |               | 28_193V6-con-qR          | AGATCGGTTACGCGGAGACTTG   |
| PpS-ACP-DES                      | Pp1s354_37V6  | 354_37 Int3--qF          | TTCCAATTTCTTGCAGGTCG     |
|                                  |               | 354_37 Int3--qR          | TCTTGCCGTCGACAAATCC      |
|                                  |               | 354_37 con--qF           | GGCCGCTTGGAAGTAGTTATG    |
|                                  |               | 354_37 con--qR           | TGTGTCTCCGTTGGTCGTTTA    |
| PpRPL37aB                        | Pp1s76_74V6   | Pp1s76_74V6-q2F          | GGCAGGGTGTGTATGTGTTG     |
|                                  |               | Pp1s76_74V6-q2R          | CAATTCGGCTTTCTTCGTG      |
|                                  |               | Pp1s76_74V6-qCF          | TCACTATGACTAAGCGCACGAA   |
|                                  |               | Pp1s76_74V6-qCR          | CCTCAAACCTGGCACCATAACG   |

|              |               |                          |                         |
|--------------|---------------|--------------------------|-------------------------|
| Pp EF1B/RPS6 | Pp1s359_29V6  | Pp1s359_29V6-qF          | TTTGTGGATGTGTAGGCCATCA  |
|              |               | Pp1s359_29V6-qR          | CCCCTGTTGAACATCTCAACGT  |
|              |               | Pp1s359_29V6-qCF         | ACCAAGCCAGAGAGCCAAAAG   |
|              |               | Pp1s359_29V6-qCR         | ATCATCGTCCCGGTTTCAGTCT  |
| PpHARS1      | Pp1s38_401V6  | 38_401 Int11--qF         | TGCTTT CACAGTGTCTTCCGT  |
|              |               | 38_401 Int11--qR         | ATCGCAAGAGATCGTCGAACAG  |
|              |               | 38_401 con--qF           | TTTATACCCGCAAAGCTGGTGA  |
|              |               | 38_401 con--qR           | TTCTCCCACCTTTGTCTCTCAA  |
| PpATG8       | Pp1s209_115V6 | 209_115 Int4--qF         | ATATGAGGCGCAGAAACTGG    |
|              |               | 209_115 Int4--qR         | AAACCCTACAAGCGCCCAT     |
|              |               | 209_115 con--qF          | TCAAGCAAGAGCATCATCTGGA  |
|              |               | 209_115 con--qR          | TGTCGCTTTTCTCCGCCTT     |
| PpRPS27      | Pp1s63_161V6  | Q_03-1_Pp1s63_161V6 (F)  | GCTTATGTCCGTCTTGTGTTGC  |
|              |               | Q_03-1_Pp1s63_161V6 (R)  | AAGCATCCTTGACACTTCACATC |
|              |               | QC_03-1_Pp1s63_161V6 (F) | GAAGTGTC AAGGATGCTTCAGC |
|              |               | QC_03-1_Pp1s63_161V6 (R) | AAGCACTGTGGAGCAACTTCC   |
| PpCYP38-2    | Pp1s90_50V6   | 90_50 Int1--qF           | CGCCTCCTCGGATATGAATTC   |
|              |               | 90_50 Int1--qR           | GGTGCGCCATAGAGATTGAAGT  |
|              |               | 90_50 con--qF            | CTGGCAAAGTGCGAACTGTTC   |
|              |               | 90_50 con--qR            | TGTTGCCTTGTACTTGCCAAG   |
| PpPPIase     | Pp1s46_106V6  | 46_106 Int9--qF          | GGAGAAGAAACAGCGCAGTGTG  |
|              |               | 46_106 Int9--qR          | GCACTCCACACTACTTCTTGCA  |
|              |               | 46_106 con--qF           | CCGTGCTTTTGGGAATGAG     |
|              |               | 46_106 con--qR           | CAAGCTCCTCTTTCTCCCAACA  |
| PpRING/U-box | Pp1s157_62V6  | 62 Ubox Int1--qF         | TGATGTGAAGTGTGCATTGCTG  |
|              |               | 62 Ubox Int1--qR         | GACAGAAACCGCATTCCAATTC  |
|              |               | 62 Ubox con--qF          | CAAACGCCGATTTCTGAAGAG   |
|              |               | 62 Ubox con--qR          | CATACGCCTTTTGTGAGCAGCAT |
| PpPsaE-2     | Pp1s334_17V6  | Pp1s334_17V6-qF          | TTTAACGACACCCGGCAAGGTT  |
|              |               | Pp1s334_17V6-qR          | AACGTGAGGAGGAGATGGAAC   |
|              |               | Pp1s334_17V6-qCF         | TGTCAAGGAAGAGGCTAAGCCA  |
|              |               | Pp1s334_17V6-qCR         | CCTCAGAACCTTAACGACGCTG  |
| PpUROD       | Pp1s114_123V6 | Pp1s114_123V6-qF         | GCTGCGATGGTTCTGTTGTACA  |
|              |               | Pp1s114_123V6-qR         | GCCAAATCCACATTCTCAGAGC  |
|              |               | Pp1s114_123V6-qCF        | TTGCGTGAGGAGGTCGGTAAT   |

|                        |              |                   |                        |
|------------------------|--------------|-------------------|------------------------|
| PpTBP1                 | Pp1s246_34V6 | Pp1s114_123V6-qCR | TGATCCGCCCTCGACTATGTAG |
|                        |              | TBP Int7--qF      | CTGTGGACCTTGCCAAACATC  |
|                        |              | TBP Int7--qR      | CAAGAACCAACCCCAACTTC   |
|                        |              | TBP con--qF       | CGCATCATTCAAAAGCTTGG   |
| PpRBCS2B               | Pp1s251_44V6 | TBP con--qR       | GGAACTTCACGTCACATGATCC |
|                        |              | Pp1s251_44V6-qF   | CTCTTACTTGCCCCATTGTCC  |
|                        |              | Pp1s251_44V6-qR   | AGAGACAGGGGACTTACCACGT |
|                        |              | Pp1s251_44V6-qCF  | GAGTTCCACCTTGTTCTCCAGC |
| PpHSFA1-3              | Pp1s84_95V6  | Pp1s251_44V6-qCR  | GAACTTCGTCATGCCAATGG   |
|                        |              | 84_95 Int2---qF   | GATTACGGCAACAGCAGCAGA  |
|                        |              | 84_95 Int2---qR   | GCGGAAAATTCAAGTACCTGCA |
|                        |              | 84_95 Con---qF    | AACITTTCCAGCTTCGTTCCGG |
|                        |              | 84_95 Con---qR    | CCGGATCAACCTTACGGAATC  |
| <b>High-resolution</b> |              |                   |                        |
| <b>RT-PCR</b>          |              |                   |                        |
| Peptidase              | Pp1s47_94V6  | 47_94FAM---F      | CATTTACGGCACACGCTCTCC  |
|                        |              | 47_94---R         | CGCCAATACTGGTGAATCAGC  |
| PpCYP38-2              | Pp1s90_50V6  | 90_50---F         | GACAACCCGAATGTGAAAGATG |
|                        |              | 90_50 FAM---R     | CTCAAGCGTGGCACCGTAG    |
| PHD finger protein     | Pp1s384_37V6 | 384_37FAM---F     | ACCACTATGACGTGCAGAGC   |
|                        |              | 384_37---R        | CTGTTGCATTCCAGCATCAC   |
| PpHSFA1-1              | Pp1s31_388V6 | 31_388E2--F       | CATCGGCTGAAGCGAAAGAG   |
|                        |              | 31_388E2--FAM_R   | CTCAATCTCCGCCTCAAGTC   |

---
